# Supplementary material for: Impact of Microclimate on People’s Experiences and Behaviours in the Cultural Consumption Space: A Case Study of Panjiayuan Antique Market in Beijing, China
Source: MDPI journal article supplement (doi:10.3390/buildings13051158), 2023-04-27
Supplement: s1 [file s1]

**Supplementary Materials:** The original questionnaire.

**Subjective Questionnaire on the perception of the microclimate**

This project is a research project of Beijing Institute of Technology, School of Design & Art. We guarantee that your personal information will not be disclosed by any means or in any form. Please answer the questions as honestly as possible. There is no right or wrong answer. Thank you for your cooperation.

1. Weather

☐ Sun    ☐ Cloudy    ☐ Rain    ☐ Haze    ☐ Snow

2. Feeling

1.....5 (good)

①                      ②                      ③                      ④                      ⑤

3. Temperature

1.....5 (high)

①                      ②                      ③                      ④                      ⑤

4. Sunshine

1.....5 (high)

①                      ②                      ③                      ④                      ⑤

5. Dryness

1.....5 (high)

①                      ②                      ③                      ④                      ⑤

6. Wind

1.....5 (high)

①                      ②                      ③                      ④                      ⑤

7. Visibility

1.....5 (clear)

①                      ②                      ③                      ④                      ⑤

8. Noise

1.....5 (loud)

①                      ②                      ③                      ④                      ⑤

9. Smell

1.....5 (good)

①                      ②                      ③                      ④                      ⑤
